# Supplementary material for: A Taxonomy Proposal for the Assessment of the Changes in Soundscape Resulting from the COVID-19 Lockdown
Source: Int J Environ Res Public Health. 2020 Jun 12;17(12):4205. doi: 10.3390/ijerph17124205 (PMC7345807; doi:10.3390/ijerph17124205)
Supplement: Supplementary file 1 [file ijerph-17-04205-s001.csv]

Identification	City	Country	Measurement Provider	Coordinates	Instrument class	Instrument brand	Prevailing sound sources	Datetime	Stage	Description of the stage	Duration	Indicator	Measurement	Miscellanious
Paris6-PlaceStMichel	Paris	France	BruitParif	48.853608;2.343507	1	01dB	mixed	20200116T2300	1		1440	Lden	75.1
Paris6-PlaceStMichel	Paris	France	BruitParif	48.853608;2.343508	1	01dB	mixed	20200109T2300	1		480	Ln	64.9
Paris6-PlaceStMichel	Paris	France	BruitParif	48.853608;2.343509	1	01dB	mixed	20200109T1600	1		240	Le	69.1
Paris6-PlaceStMichel	Paris	France	BruitParif	48.853608;2.343510	1	01dB	mixed	20200109T0800	1		720	Ld	70.2
NMT2-PzaCarlosV	Madrid	Spain	Ayto Madrid	40.4091095;-3.6914895	1	Bruel & Kjaer	road	20200501T0800	2	events suspended; Schools closed; Non-essential shops closed; Non-essential movement banned; Land border closed	60	LAeq	67.0
NMT2-PzaCarlosV	Madrid	Spain	Ayto Madrid	40.4091095;-3.6914896	1	Bruel & Kjaer	road	20200501T0900	2	events suspended; Schools closed; Non-essential shops closed; Non-essential movement banned; Land border closed	60	LAeq	68.5
NMT2-PzaCarlosV	Madrid	Spain	Ayto Madrid	40.4091095;-3.6914897	1	Bruel & Kjaer	road	20200501T1000	2	events suspended; Schools closed; Non-essential shops closed; Non-essential movement banned; Land border closed	60	LAeq	69.2
NMT2-PzaCarlosV	Madrid	Spain	Ayto Madrid	40.4091095;-3.6914898	1	Bruel & Kjaer	road	20200501T1100	2	events suspended; Schools closed; Non-essential shops closed; Non-essential movement banned; Land border closed	60	LAeq	70.0
NMT2-PzaCarlosV	Madrid	Spain	Ayto Madrid	40.4091095;-3.6914899	1	Bruel & Kjaer	road	20200501T1200	2	events suspended; Schools closed; Non-essential shops closed; Non-essential movement banned; Land border closed	60	LAeq	69.5
NMT48-Castellana	Madrid	Spain	Ayto Madrid	40.4398904;-3.6903729	1	Bruel & Kjaer	nightlife	20200227T0100	1		60	LAeq	66.2
NMT48-Castellana	Madrid	Spain	Ayto Madrid	40.4398904;-3.6903730	1	Bruel & Kjaer	nightlife	20200227T0200	1		60	LAeq	63.0
NMT48-Castellana	Madrid	Spain	Ayto Madrid	40.4398904;-3.6903731	1	Bruel & Kjaer	nightlife	20200227T0300	1		60	LAeq	63.3
NMT48-Castellana	Madrid	Spain	Ayto Madrid	40.4398904;-3.6903732	1	Bruel & Kjaer	nightlife	20200227T0400	1		60	LAeq	62.3
